# Supplementary material for: Age- and Temperature-Dependent Somatic Mutation Accumulation in Drosophila melanogaster
Source: PubMed Central journal article supplement (PMC2869313; doi:10.1371/journal.pgen.1000950), 2010-05-13

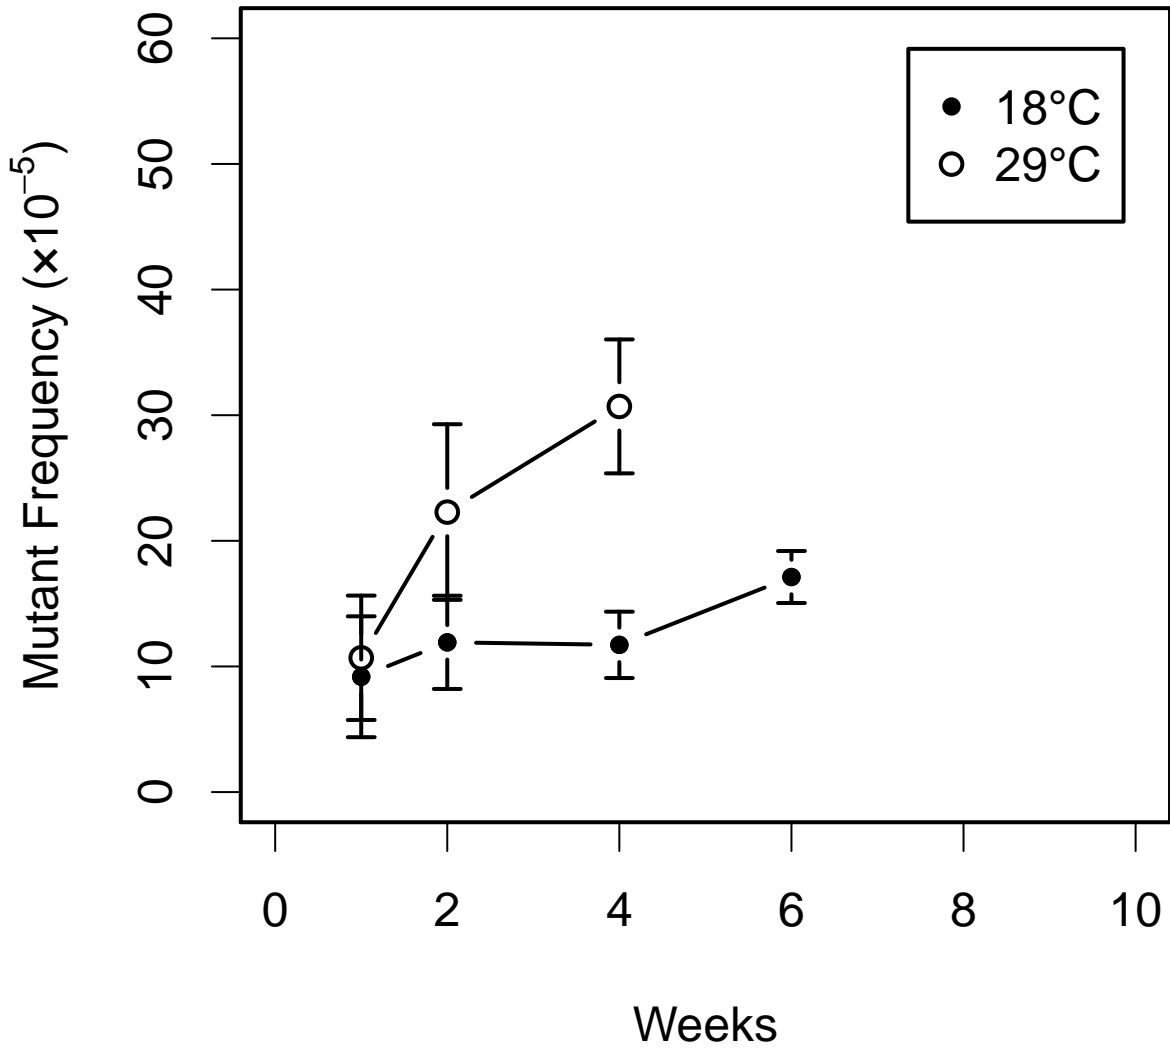

Supplement: pgen.1000950.s001.pdf [file pgen.1000950.s001.pdf]
