# Supplementary material for: Age- and Temperature-Dependent Somatic Mutation Accumulation in Drosophila melanogaster
Source: PLoS Genet. 2010 May 13;6(5):e1000950. doi: 10.1371/journal.pgen.1000950 (PMC2869313; doi:10.1371/journal.pgen.1000950)
Supplement: Table S1 — Somatic genome rearrangements in D. melanogaster at 18°C and 29°C. (0.03 MB XLS) [file pgen.1000950.s003.xls]

## Sheet: Sheet1
Supplementary Table 1. Somatic genome rearrangements in D. melanogaster at 18°C and 29°C.
Temperature	Sample ID	Type of event	5' sequence at breakpoint	3' sequence at breakpoint	Location 3' breakpoint1	Position 5' breakpoint2	Position 5' breakpoint3	Orientation 5' breakpoint4	Distance5
18	9	internal deletion	GATATGTGGCGGATGAGCGG	TGAATAGTTGTGATGCCTCA	reporter construct	1709	2134	-	424
	11	internal deletion	AAACTATCCCGACCGCCTTA	TACATTCAAATATGTATCCG	reporter construct	2949	3470	-	520
	4	internal deletion	CACGACGCGCTGTATCGCTG	CGCCATCCCGCATCTGACCA	reporter construct	1639	2423	-	783
	5	internal deletion	AGCCCTTCCCGGCTGTGCCG	CTGCGGGACGCGCGAATTGA	reporter construct	1766	3030	-	1263
	24	internal deletion	TCGTTTTACAACGTCGTGAC	ACGCCTATTTTTATAGGTTA	reporter construct	256	3357	-	3100
	15	internal deletion	GCGGTGCCGGAAAGTTGGCT	TTTCCGTGTCGCCCTTATTC	reporter construct	439	3566	-	3126
	7	deletion	TGACCACCAGCGAAATGGAT	CAAATAGCTGATTAATTTAT	3R	2456	908448	P	7122
	13	deletion	TGATTACGGATTCACTGGCC	AAACCGAATCGCCGGAAGAA	3R	242	906767	P	11017
	22	deletion	TTCCCGGCTGTGCCGAAATG	AAACAACATTTTATATTTGT	3R	1771	863653	P	52602
	3	inversion	TGATTGAACTGCCTGAACTA	TATAGATATTCTGGACCAGG	3R	2273	2607896	D	1703289
	21	inversion	TAAACCGACTACACAAATCA	TGTCGTGGCATCCGCACCAT	3R	885	2686546	D	1780551
	19	inversion	CGTCCCCTCAAACTGGCAGA	GTCCCGGATCCAGGACCTCG	3R	492	24558309	D	23651921
	8	inversion	CCTGGAGAGACGCGCCCGCT	TAACTAACTCAAACTTGTTA	3R	1816	25578007	D	24672943
	20	transposition	CTGAACGGCAAGCCGTTGCT	TATTAGCACGTTAATAAAAA	3R	1267	2053923	P	1148310
	17	transposition	TTATCTGGAAGATCAGGATA	ATTAACCCGGCCAAATTAGT	3R	822	19256938	P	18350880
	10	unresolved intrachromosomal event	CAAATCAGCGATTTCCATGT	GTTGTAATTTATAATTTATA	3R	898	?7	-	?7
	14	unresolved chromosomal rearrangement	GCTCACATTTAATGTTGATG	TTGAGCTGACAGAACCATTT	multiple6	609	?7	-	-
	12	unresolved chromosomal rearrangement	GCTACAGGAAGGCCAGACGC	CCTCATCCAAATGAAGCGAG	multiple6	636	?7	-	-
	18	unresolved chromosomal rearrangement	CCGCGCCTTTCGGCGGTGAA	GGTGCAGTTGGGAGGACCAG	multiple6	1049	?7	-	-
	16	unresolved chromosomal rearrangement	TGGCGCTGGATGGTAAGCCG	AATGTGGTCATGCTCTAAAG	U	2204	1064154	-	-
29	29	internal deletion	CTCGCTTTAATGATGATTTC	CGTTTATCCGGGCAAACCAT	reporter construct	923	2103	-	1179
	45	internal deletion	GTATCCCCGTTTACAGGGCG	ATGTATCCGCTCATGAGACA	reporter construct	1911	3482	-	1570
	28	internal deletion	TCCGTTTATCCGGGCAAACC	GTGTTGACGCCGGGCAAGAG	reporter construct	2123	3786	-	1662
	34	internal deletion	AACAGTCTTGGCGGTTTCGC	CCTTATTCCCTTTTTTGCGG	reporter construct	1863	3567	-	1703
	47	internal deletion	ATGTGCGGCGAGTTGCGTGA	AACCATGAGTGATAACACTG	reporter construct	973	3303	-	2329
	48	internal inversion	CCACGCCATCCCGCATCTGA	TTATTTTTAATAATTTGCGA	reporter construct	2439	4127	D	1688
	31	inversion	ATTTTCCGTGACGTCTCGTT	CGAAGTAAAATTAGTGCAAA	3R	859	956309	D	50288
	43	inversion	CAACCCTGGCGTTACCCAAC	AAAACTCCAGGCAGTTTGTA	3R	288	823417	D	94321
	39	inversion	CGCGATCGTAATCACCCGAG	CGCGGTCTGCAGCAGAGGAT	3R	1573	767368	D	149085
	46	inversion	-	-	3R	-	-	D	~165,000
	40	inversion	ATCAGTCGCTGATTAAATAT	ATAAAAAACATAGAAATCAT	3R	1952	3373451	D	2468523
	27	inversion	TGTGGTGCAACGGGCGCTGG	TTCCGAACAGTGGCATTCAG	3L	692	21543783	P	22461117
	42	transposition	ATGATTACGGATTCACTGGC	GCAACGGTTAAGTTAGCCAG	3R	241	912275	P	5510
	26	transposition	-	-	3R	-	-	P	~7,800
	41	transposition	CCGTCTGAATTTGACCTGAG	AAACAGGAAATGTGGGTTGG	3R	739	915234	P	9093
	30	transposition	GCGGCGAGTTGCGTGACTAC	GAATGCGGTTTTGCGGATTG	3R	977	947233	P	41330
	44	transposition	GGATGAGCAGACGATGGTGC	CTGATGCACGAAAAAATGGG	3R	1338	12196582	P	11291040
	25	transposition	GCGACCGCTACGGCCTGTAT	CAAATATTATACATGGCAGC	3R	1442	22504450	P	21599012
	32	translocation	TGGATGAGCAGACGATGGTG	TTCCCATCCCTTGTTGTCTT	2R	1337	13521706	P	-
	35	translocation	-	-	2L	-	22577743	P	-
	33	unresolved chromosomal rearrangement	TTTGCCTGGTTTCCGGCACC	CTTATCAACGAACCTTGTAT	multiple6	415	?7	P	-
	36	unresolved chromosomal rearrangement	-	-	U	-	?7	-	-
1. Chromosomal location of the break-point or position of the event when inside the lacZ reporter.
2. Position of the breakpoint(s) in the lacZ gene (see Garcia, et al. Nat Methods. 2007 for the lacZ sequence).
3. Position of the break-point in the Drosophila genome as inferred from the 5' genomic sequence captured in the lacZ reporter (see Garcia, et al. Nat. Meth., 2007).
4. Inferred orientation of the mapped break-point sequence. Distal (toward the telomere) or proximal (toward the centromere).
5. Distance covered by the event.
6. Multiple high-confidence matches to different genomic scaffolds.
7. Multiple high-confidence matches on the same chromosome.
